# Supplementary material
Source: Springer Nature journal article supplement (https://www.springermedizin.de/resource/supplementary/13075_2009_2788_MOESM2_ESM.pdf/9692884)

Baseline

Week 12

Site of Inflamed Entheses

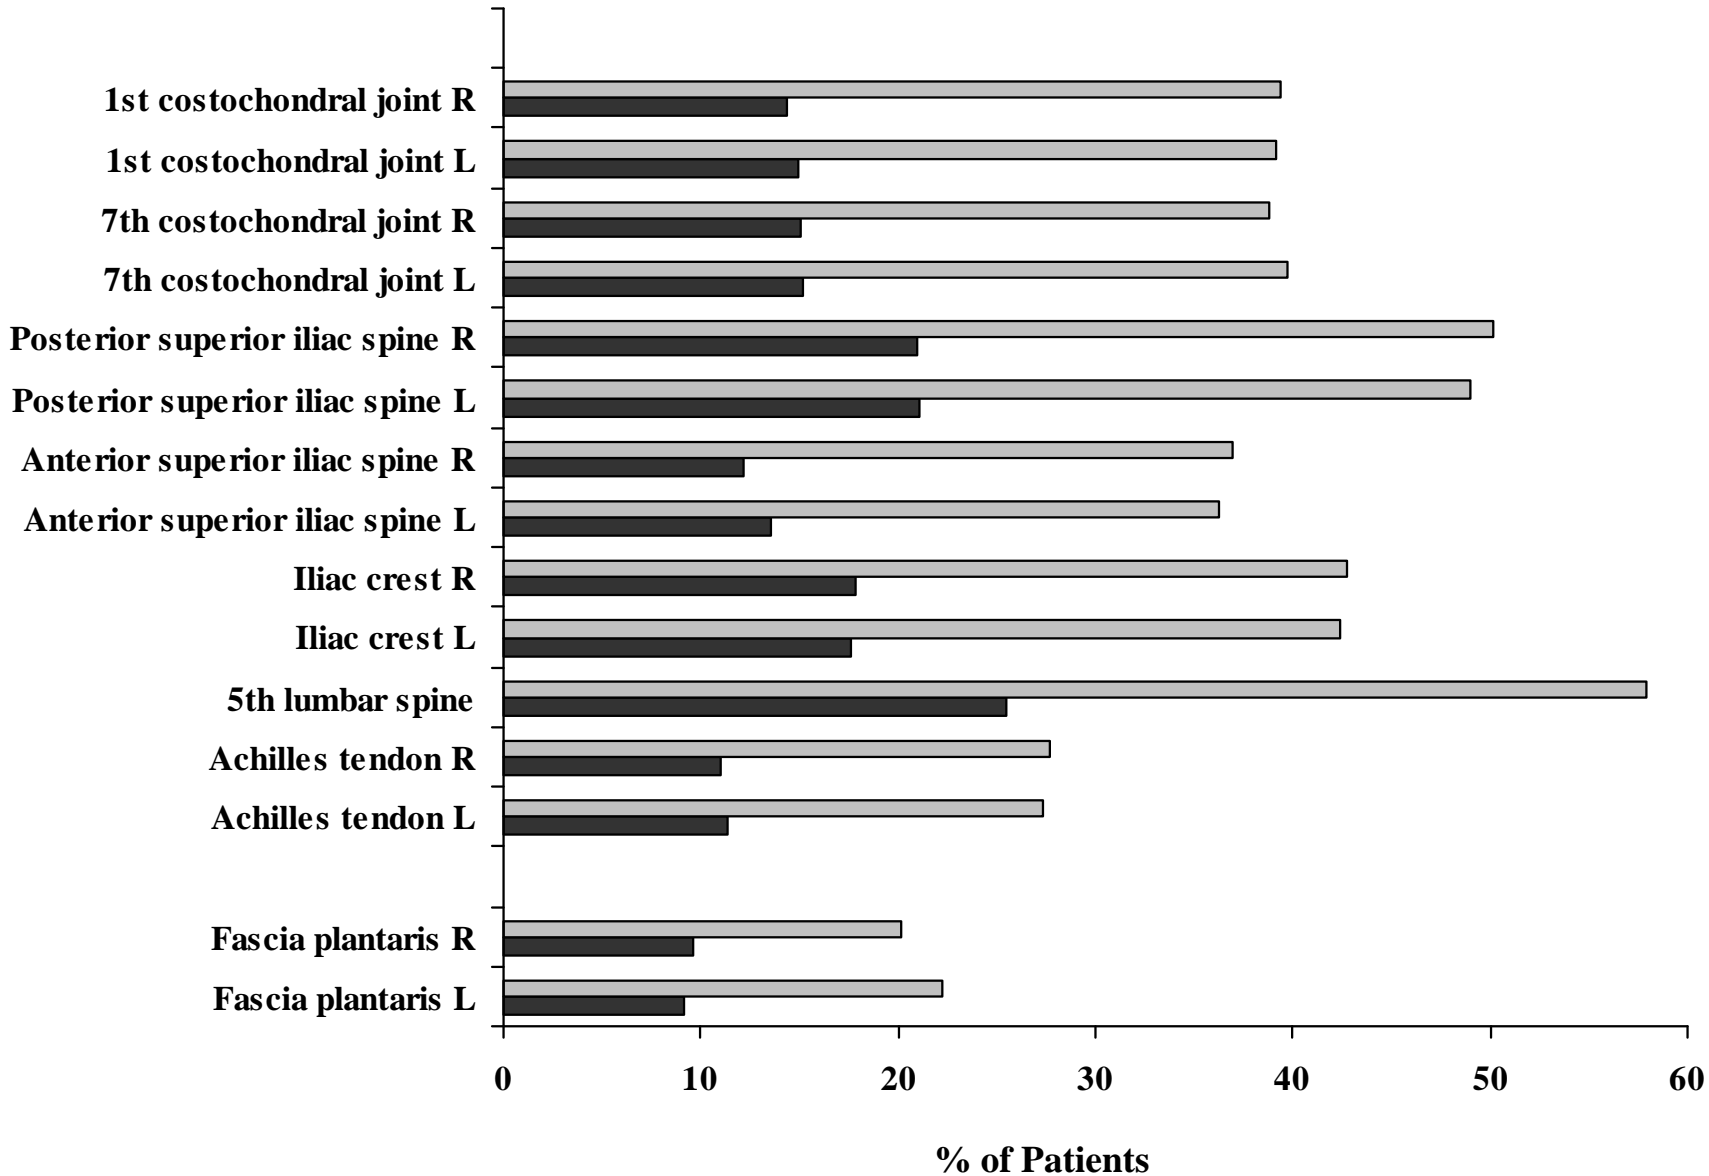

Supplement: MOESM2 [file 9692884]
